# Supplementary material for: Antiviral and Antibacterial Sulfated Polysaccharide–Chitosan Nanocomposite Particles as a Drug Carrier
Source: MDPI journal article supplement (doi:10.3390/molecules28052105), 2023-02-23
Supplement: s1 [file s1]

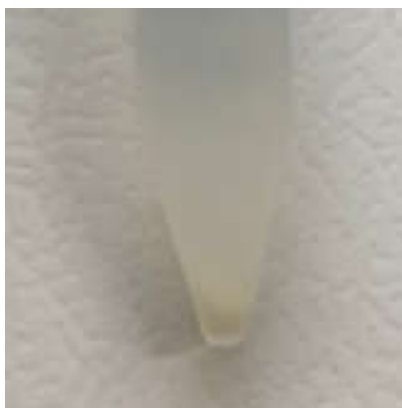

**Figure S1.** Precipitation was observed for APC at the AP: CS weight ratio of 1:1.5.

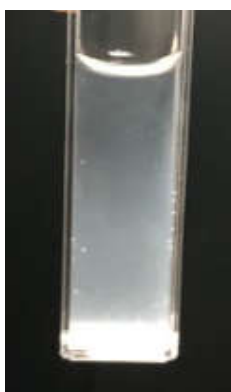

**Figure S2.** Precipitation occurred for APC2 in alkaline PBS solution (pH = 10) after 7 days.

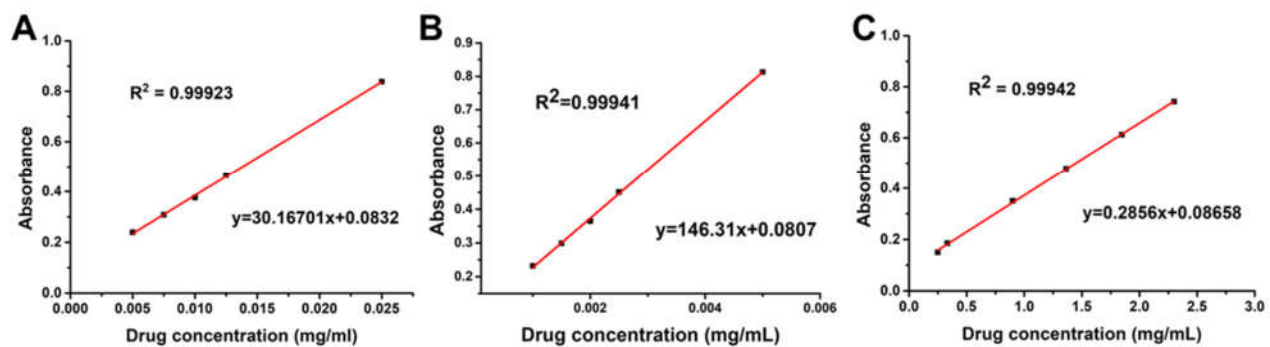

**Figure S3.** The calibration curves of fast green, curcumin, and HEBR.

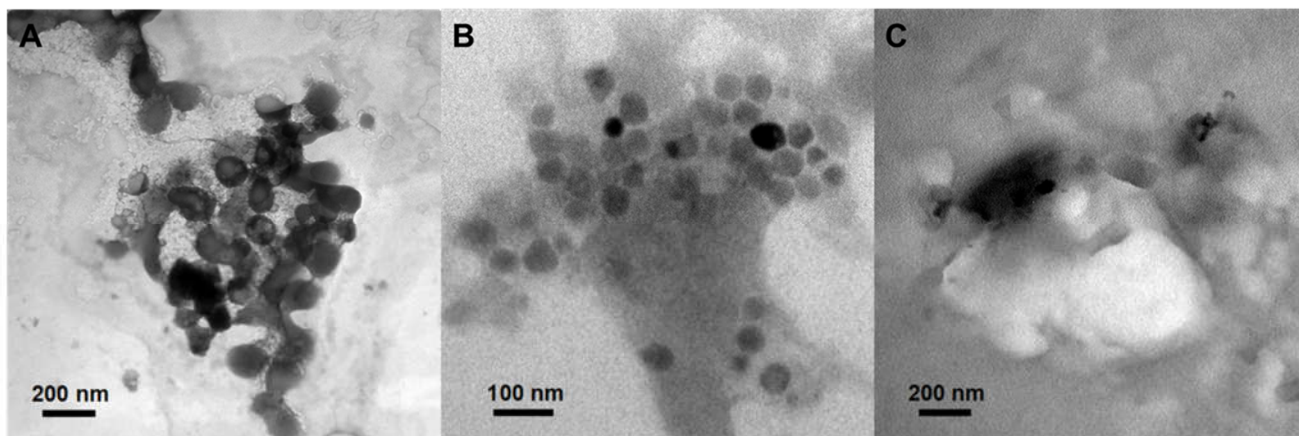

**Figure S4.** TEM images of initial drug-loaded APC nanoparticles (APC-F, APC-C, and APC-H). All drug-APC complex nanoparticles were prepared in DI water and observed at day 0.

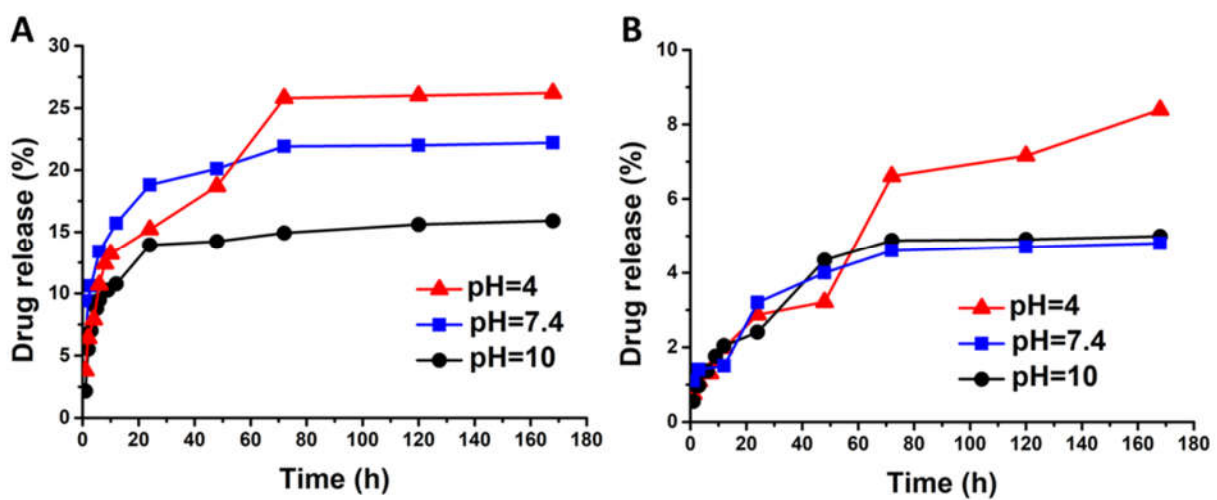

**Figure S5.** Release profiles of different drug-loaded APC nanoparticles. The release curves of (A) fast green and (B) curcumin from APC-F and APC-C nanoparticles respectively under different pH values.
